# Supplementary material for: Pseudorotaxane-type fluorescent receptor exhibiting unique response to saccharides
Source: Royal Society of Chemistry journal article supplement (doi:10.1039/b606342j), 2006-01-01
Supplement: b606342j.pdf [file b606342j.pdf]

[Electronic Supplementary Information]

### **Pseudorotaxane-type fluorescent receptor exhibiting unique response to saccharides**

Akiyo Yamauchi,<sup>a</sup> Yoshiko Sakashita,<sup>a</sup> Kazuaki Hirose,<sup>a</sup> Takashi Hayashita,<sup>b</sup> and Iwao Suzuki\*<sup>a</sup>

<sup>a</sup>Graduate School of Pharmaceutical Sciences, Tohoku University

Aramaki, Aoba-ku, Sendai 980-8578, Japan.

Fax: +81-22-795-5916; Tel: +81-22-795-6802; E-mail: [isuzuki@mail.pharm.tohoku.ac.jp](mailto:isuzuki@mail.pharm.tohoku.ac.jp)

<sup>b</sup>Department of Chemistry, Faculty of Science and technology, Sophia University

7-1 Kioicho, Chiyoda-ku, Tokyo 102-8554, Japan.

Fax: +81-3-3238-3361; Tel: +81-3-3238-3372; E-mail: [ta-hayas@sophia.ac.jp](mailto:ta-hayas@sophia.ac.jp)

---

#### *Synthesis of 1.*

4-Carboxyphenylboronic acid (266 mg, 1.6 mmol), DCC (330 mg, 1.6 mmol), and 1-hydroxybenzotriazole monohydrate (245 mg, 1.6 mmol) were dissolved with pyridine (20 mL), and stirred for 1 h in an ice bath. 3-Amino-3-deoxy- $\beta$ -cyclodextrin (907 mg, 0.8 mmol)<sup>S1</sup> was added to the solution at once, and the solution was stirred for 1 h in an ice bath and for 12 h at room temperature. Precipitates formed were removed with a cotton plug, and the filtrate was concentrated to approximately 5 mL. The concentrated mixture was poured into acetone (200 mL) with vigorous stirring. White precipitates formed were collected, washed with acetone followed by ether, and dried *in vacuo* (60 °C).

This material was dissolved with water (10 mL) and lead to a reverse phase column (Chromatorex DM-1020T, 2 × 10 cm, pre-equilibrated with 10% MeOH). Step gradient elution was made with 10% and 20% MeOH. The fractions of 20% MeOH were collected, and concentrated. Glassy solids obtained were re-dissolved with water to be lyophilized to afford white fluffy powders (808 mg, 71%).  $m/z$  (FAB, matrix thioglycerol (TG)) 1376 ( $[M+TG-2H_2O+Na]^+$ );  $\delta_H$  (600 MHz, DMSO- $d_6$ , referred to DMSO- $d_5$  (internal, 2.490 ppm)) 3.2-4.0 (m, overlapped with  $H_2O$ ), 4.34-4.52 (m, 6H), 4.66-5.02 (m, 8H), 5.30-5.90 (m, 15H), 7.7940 (d,  $J = 8.3$  Hz, 2H), 7.8352 (d,  $J = 8.3$  Hz, 2H), 8.0775 (d,  $J = 8.9$  Hz, 1H), 8.1479 (s, 2H); Found C, 44.0; H, 6.1; N, 1.0.  $C_{49}H_{76}BNO_{37} \cdot 3H_2O$  requires C, 44.1; H, 6.2; N, 1.1%.

#### *Synthesis of C7SP.*

A mixture of 1-heptyl-4-methylpyridinium bromide (3.68 g, 13.5 mmol), which was prepared from 4-picoline and 1-bromoheptane, 4-dimethylaminobenzaldehyde (1.98 g, 13.3 mmol), and piperidine (1.3 mL) in EtOH (20 mL) was heated at reflux for 6 h under  $N_2$  atmosphere. After being left in ice bath, reddish precipitates formed were collected, and washed with a cold EtOH. The obtained solids were recrystallized from EtOH – *n*-hexane (1:3). Yield 2.68 g (50%).  $m/z$  (FAB) 323.2472 ( $M^+$ .  $C_{22}H_{31}N_2$  requires 323.2486);  $\delta_H$  (600 MHz,  $D_2O$ , referred to  $CH_3CN$  (internal, 1.930 ppm)) 0.7103 (t,  $J = 6.9$  Hz, 3H), 1.12 (m, 4H), 1.19 (m, 4H), 1.8281 (quant,  $J = 7.6$  Hz, 2H), 2.8714 (s, 3H), 4.2811 (t,  $J = 6.8$  Hz, 3H), 6.8093 (d,  $J = 8.9$  Hz, 2H), 6.9833 (d,  $J = 16.5$  Hz, 1H), 7.5273 (d,  $J = 8.9$  Hz, 2H), 7.61715 (d,  $J = 15.8$  Hz, 1H), 7.7867 (d,  $J = 6.9$  Hz, 2H), 8.3467 (d,  $J = 6.2$  Hz, 2H); Found: C, 63.1; H, 7.5; N, 6.6.  $C_{22}H_{31}BrN_2$  requires C, 65.5; H, 7.8; N, 6.9%. Results of the elemental analyses indicate approximately 96% dye content.

#### *Determination of $pK_a$ of I.*

The  $pK_a$  values of **1** alone and in the presence of D-fru, D-glc, D-gal, and D-man were determined from the pH-dependent UV-vis absorbance changes. Figure S1 shows the UV-vis spectra of **1** at various pH. A photometric method to determine  $pK_a$  of phenylboronic acid derivatives is straightforward. However, none of researches have paid attention on the strong absorption band around 230 nm of the phenylboronic acid derivatives, rather many researches used the pH-dependent absorbance changes at the UV absorption band around 280 nm. Thus, we would like to brief description on the pH-dependent UV-vis spectral changes around the 230 nm band.

Under acidic conditions, **1** shows the absorption maximum at 237 nm, whereas the peak position is shifted to 243 nm under alkaline conditions with the isosbestic point at 245 nm. The bathochromic shift of **1** at high pH may be related to the generation of a negative charge on the boron atom. The observed bathochromic shift accompanies the hypochromic effect. Figure S2 shows the pH dependence of absorbance at 237 nm. From this titration curve, the  $pK_a$  value of **1** was determined to be  $7.63 \pm 0.01$ . Apparent  $pK_a$  values of **1** in the presence of 30 mM of each saccharide were also determined. The obtained  $pK_a$  values are described in the text. In the  $^1\text{H}$  NMR spectra, a single peak at 7.60 ppm (referred to HOD at 4.67 ppm) was observed at pH(D) above 10. As pH(D) decreased, the single peak became split into two equivalent doublet peaks. Below pH(D) 6, the two peaks existed at 7.73 and 7.80 ppm. This  $^1\text{H}$  NMR titration results also yielded the  $pK_a$  value of **1** to be  $8.06 \pm 0.09$ , which agreed well with the  $pK_a$  value of **1** determined from the UV-vis titration experiments when the well-known relationship of  $pD = \text{pH} + 0.4$  was taken into account.

#### *Determination of $pK_a$ of C7SP.*

Since **C7SP** has an *N,N*-dimethylamino moiety on the benzene ring, it would act as a weak base in an aqueous solution. The  $pK_a$  of **C7SP** was determined by pH-dependent UV-vis spectral changes. Figure S3 shows plots of absorbance at 444 nm as a function of pH. This sigmoidal plot allowed us to

determine the  $pK_a$  value of **C7SP** to be  $3.27 \pm 0.01$ .

*pH dependence of pseudorotaxane-type complexation of C7SP with 1.*

Based on the  $pK_a$  values of **1** and **C7SP**, the neutral form of **C7SP** prevailed, whereas both anionic and neutral forms of **1** are present, when they exist in a neutral aqueous solution. It is known that both *intra-* and *intermolecular* guest binding properties of modified CDs are affected by the acid-base equilibrium of a pendant moiety.<sup>S2</sup> From this viewpoint, we investigated the complexation of **C7SP** with **1** at pH 5.6 and 9.6 in addition to pH 7.2. At pH 5.6, both **1** and **C7SP** exist as their neutral forms, whereas the anionic form is predominant species for **1** at pH 9.6. <sup>1</sup>H NMR titration experiments revealed that the **C7SP** formed both 1:1 and 1:2 host-guest complexes with **1** at pH(D) 5.6 and 9.6 (Figs S4 and S5) as in the case of pH(D)7.2. It is noteworthy that the titration plots of Figs. 2, S4, and S5 look similar. This similarity indicates that the binding conformations of the **C7SP/1** complex are scarcely affected by the negative charge of **1**. From the <sup>1</sup>H NMR titration results, we propose the conformations of the 1:1 and 2:1 complexes as Fig. S6.

Although the binding conformations of the **C7SP/1** complex assumed to be independent of pH, the stabilities of the complexes are affected by pH. This was confirmed by fluorescence intensity changes (472 nm) of **C7SP** caused by **1** from which  $K_1$  and  $K_2$  values for the **C7SP/1** complex were successfully determined (Fig S7). The obtained  $K_1$  and  $K_2$  values are listed in Table S1. In summary, both the  $K_1$  and  $K_2$  values become larger as pH increases. This pH dependence associated with the complex formation indicates that the anionic form of **1** is a better host for cationic **C7SP**. Contribution of the electrostatic interaction between **1** and **C7SP** may be a good reason for the increased stability of the **C7SP/1** complex under alkaline conditions.

The largest  $K_1$  value at pH 9.6 is acceptable, because the chemical shift changes (Figs. 2, S4, and S5) indicate that the first step complexation (resulting in  $K_1$ ) occurs at the aromatic moiety of **C7SP**

where the positive charge exists. The  $K_2$  value at pH 9.6 also increased. We consider that this increase in the  $K_2$  value is due to the CH- $\pi$  interaction between the anionic phenylboronate residue of **1** and the methylene (and methyl) groups of **C7SP**. The negative charge generated at the boron atom of **1** may increase the  $\pi$  basicity of the phenylboronic acid residue, leading to the increased stability of the 1:2 complexes. In addition, the anionic character of the phenylboronic acid residue makes it difficult to insert itself into the hydrophobic cavity of **1**. Insertion of a pendant group of modified CDs (*intramolecular* complex formation) generally hinders guest accommodation.<sup>S3</sup> When the phenylboronic acid residue of **1** becomes its anionic form, *intramolecular* complex formation may be suppressed, and the *intermolecular* complex formation with **C7SP** may be facilitated.

*On the mechanism of fluorescence enhancement.*

The fluorescence titration experiments at different pH confer important information for the prominent fluorescence of the **C7SP/1** and **C7SP/1/saccharide** complexes. As described in the text, the presence of the phenylboronic acid residue was critical to the marked fluorescence enhancement of **C7SP** when it complexed with **1**. The increased stabilities of the **C7SP/1** complex under the alkaline condition demonstrate that the negative charge of the phenylboronic acid residue of **1** actually stabilizes the 1:1 and 1:2 complexes. We consider that the electrostatic and CH- $\pi$  interactions are operative to gain the stabilities. From the viewpoint of the fluorescence enhancements, the first step complexation is more important, because this complexation step involves the  $\pi$ - $\pi$  interaction attributable to a modulator of fluorescence in many complexes. In the case of **C7SP**, the weak fluorescence in aqueous solution is partly due to the hydrophilicity around **C7SP** molecules. However, the limited fluorescence enhancement caused by  $\beta$ -CD expects that other mechanisms are operative in the further enhancement of the fluorescence of **C7SP**.

The fluorescence enhancement factors for the first and second steps of the complexation ( $R_1$  and  $R_2$ ,

respectively, Table S1) were larger when pH increased. As described above, the  $\pi$ - $\pi$  interaction between the aromatics of **C7SP** and **1** was more effective at pH 9.6. The increased  $\pi$ - $\pi$  interaction restricts the molecular motion of **C7SP**, promoting the fluorescent decay pathway. When the phenylboronic acid residue of **1** is in its neutral form, the electrostatic interaction is absent to weaken the  $\pi$ - $\pi$  interaction between the aromatics of **C7SP** and **1**. The weakened  $\pi$ - $\pi$  interaction renders the molecular motion of **C7SP** free in some extent, resulting in the observed smaller  $R_1$  and  $R_2$  values at pH 5.7. In the presence of the monosaccharides, the phenylboronic acid residue of **1** forms cyclic boronate ester in which a negative charge is appended at the boron atom. Owing to the generated negative charge, the fluorescence of **C7SP** would be enhanced further when saccharides to bind **1** are present in a solution. The smaller and larger fluorescence enhancements caused by D-fru and D-glc, respectively, may be due to the difference in the binding conformations, because D-fru/**1** and D-glc/**1** are different hosts for **C7SP**.

Since the above discussion is still speculative, we need more concrete evidence to clarify the mechanism for the observed fluorescence enhancement. Based on the above proposed mechanism, we are now undertaking several experiments to get insight into the fluorescence enhancements.

## References

- S1 T. Murakami, K. Harata and S. Morimoto, *Chem. Lett.*, 1987, 321.
- S2 I. Suzuki, M. Ui and A. Yamauchi, *J. Am. Chem. Soc.*, 2006, **128**, 4498 (supporting information);  
I. Suzuki, Y. Kato, Y. Egawa, J. Anzai, M. Wadamori, H. Yokomizo and K. Takahashi, *J. Mol. Struct.*, 2002, **602-603**, 223.
- S3 T. Kuwabara, H. Nakajima, N. Nanasawa and A. Ueno, *Anal. Chem.*, 1999, **71**, 2844; Y. Liu, C. -C. You, S. He, G. -G. Chen and Y. -L. Zhao, *J. Chem. Soc., Perkin Trans. 2*, 2002, 463.

Table S1. Binding Constants ( $K_1$  and  $K_2$ ) and Fluorescence Enhancement Factors ( $R_1$  and  $R_2$ ) of **1** ( $pK_a = 7.63$ ) with **C7SP** ( $pK_a = 3.27$ ) at Different pH.

| pH  | $K_1 / M^{-1}$   | $R_1$ | $K_2 / M^{-1}$ | $R_2$ |
|-----|------------------|-------|----------------|-------|
| 5.7 | $5100 \pm 720$   | 25    | $350 \pm 90$   | 51    |
| 7.2 | $16200 \pm 1500$ | 128   | $1760 \pm 190$ | 241   |
| 9.7 | $23100 \pm 2600$ | 189   | $2320 \pm 240$ | 278   |

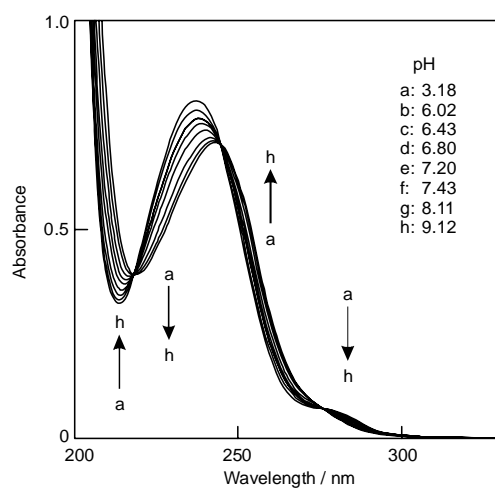

Fig. S1 UV-vis spectra of **1** ( $5.08 \times 10^{-5}$  M) at various pH in water.

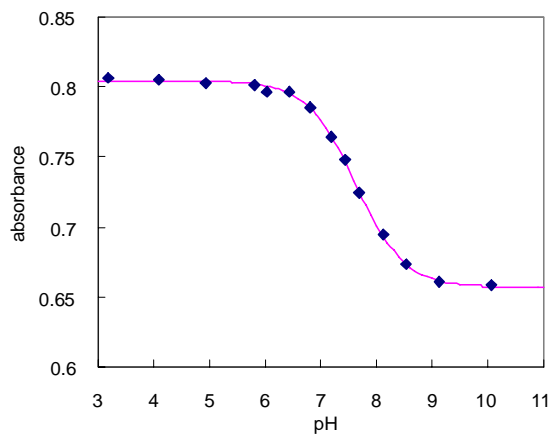

Fig. S2 Plots of absorbance at 237 nm of **1** as a function of pH. The solid line is the best fit pH titration curve with  $pK_a$  7.63.

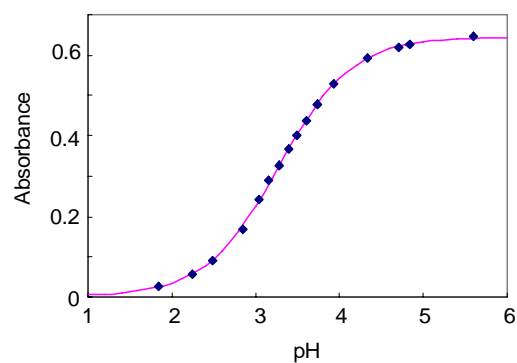

Fig. S3 Plots of absorbance at 444 nm of **C7SP** as a function of pH. The solid line is the best fit pH titration curve with  $pK_a$  3.27.

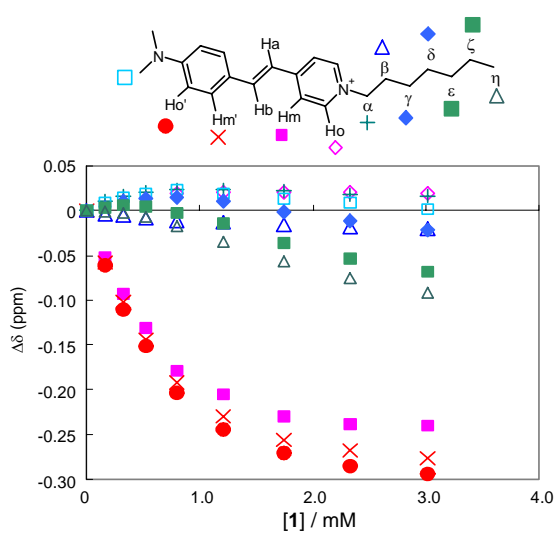

Fig. S4 Chemical shift changes of **C7SP** (0.65 mM) upon the addition of **1** in  $D_2O$  buffered by acetate ( $I = 0.1$  M,  $pH(D)$  5.7). Negative and positive  $\Delta\delta$  values correspond to high- and low-field shifts, respectively. Ha and Hb signals were severely broadened to disappear at 0.2 mM **1**.

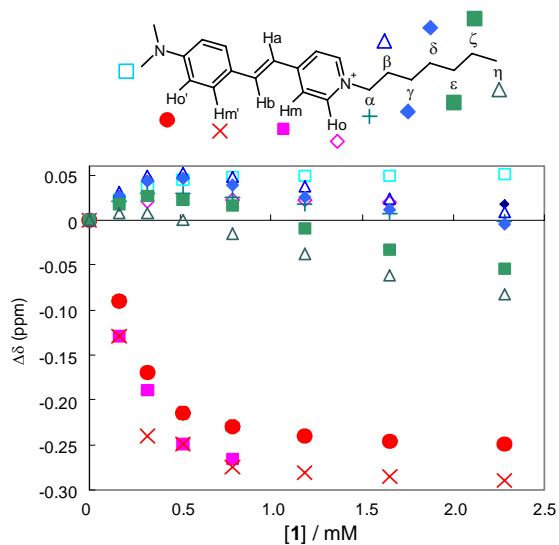

Fig. S5 Chemical shift changes of **C7SP** (0.35 mM) upon the addition of **1** in  $D_2O$  buffered by carbonates ( $I = 0.1$  M,  $pH(D)$  9.7). Negative and positive  $\Delta\delta$  values correspond to high- and low-field shifts, respectively. Ha and Hb signals were severely broadened to disappear at 0.1 mM **1**.



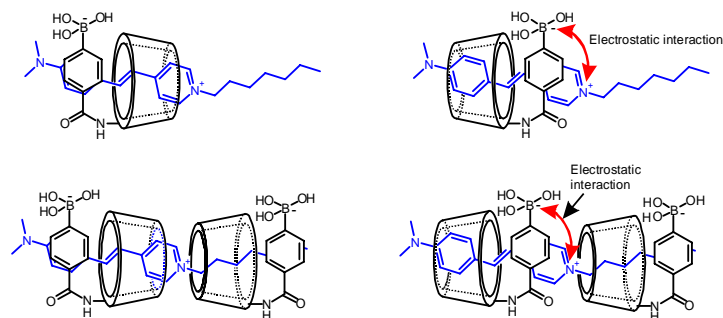

Fig. S6 Cartoons for plausible 1:1 (top) and 1:2 (bottom) complexes of **C7SP** with **1**, deduced from the  $^1\text{H}$  NMR titration data.

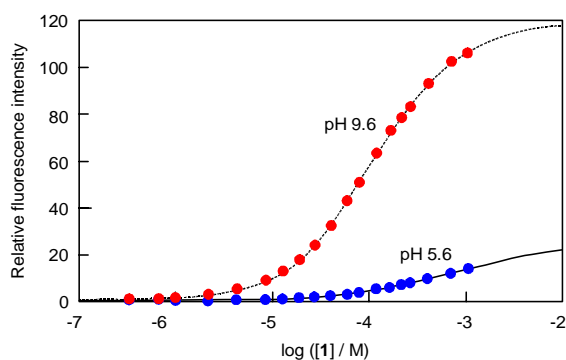

Fig. S7 Fluorescence intensity variations of **C7SP** ( $36\ \mu\text{M}$ ) induced by **1** in pH 5.6 (acetate buffer,  $I = 0.07\ \text{M}$ ; blue circle) or pH 9.6 (carbonate buffer,  $I = 0.07\ \text{M}$ ; red circle). The solid and dashed lines are the best-fit curves with  $K_1 = 5100\ \text{M}^{-1}$  and  $K_2 = 350\ \text{M}^{-1}$  (pH 5.6, solid line) and with  $K_1 = 23100\ \text{M}^{-1}$  and  $K_2 = 2320\ \text{M}^{-1}$  (pH 9.6, dashed line).
